# Supplementary material
Source: PubMed Central journal article supplement (PMC3738832)
Supplement: mmc1.pdf [file mmc1.pdf]

## Supplemental Data

### ***TM4SF20* Ancestral Deletion and Susceptibility to a Pediatric Disorder of Early Language Delay and Cerebral White Matter Hyperintensities**

Wojciech Wiszniewski, Jill V. Hunter, Neil A. Hanchard, Jason R. Willer, Chad Shaw, Qi Tian, Anna Illner, Xueqing Wang, Sau W. Cheung, Ankita Patel, Ian Campbell, Patricia Hixson, Audrey R. Ester, Mahshid S. Azamian, Lorraine Potocki, Gladys Zapata, Patricia P. Hernandez, Melissa B. Ramocki, Regie L.P. Santos-Cortez, Gao Wang, Michele K. York, Monica Justice, Zili D. Chu, Patricia I. Bader, Lisa Omo-Griffith, Nirupama S. Madduri, Gunter Scharer, Heather P. Crawford, Pattamawadee Yanatatsaneejit, Anna Eifert, Jeffery Kerr, Carlos A. Bacino, Adiaha I.A. Franklin, Robin Goin-Kochel, Gayle Simpson, Ladonna Immken, Muhammad E. Haque, Marija Stosic, Misti D. Williams, Thomas M. Morgan, Sumit Pruthi, Reed Omary, Simeon A. Boyadjiev, Kay K. Win, Aye Thida, Matthew Hurles, Martin Lloyd Hibberd, Chiea Chuen Khor, Nguyen Van Vinh Chau, Thomas E. Gallagher, Apiwat Mutirangura, Pawel Stankiewicz, Arthur L. Beaudet, Mirjana Maletic-Savatic, Jill A. Rosenfeld, Lisa G. Shaffer, Erica E. Davis, John W. Belmont, Sarah Dunstan, Cameron Simmons, Penelope Bonnen, Suzanne M. Leal, Nicholas Katsanis, James R. Lupski, and Seema R. Lalani

#### **Table of Contents**

|                                                                                                                                                               |    |
|---------------------------------------------------------------------------------------------------------------------------------------------------------------|----|
| Figure S1. Study design showing evaluation of three major groups for the <i>TM4SF20</i> complex deletion.....                                                 | 2  |
| Figure S2. Extended pedigree analysis of the Vietnamese family, TM200, using brain imaging studies.....                                                       | 3  |
| Figure S3. <i>TM4SF20</i> deletion in the Vietnamese patient, 017-1 and his 5-year-old brother with significant language impairment.....                      | 5  |
| Figure S4. Extended analysis of family TM900 from Philippines.....                                                                                            | 7  |
| Figure S5. WMH in adults with <i>TM4SF20</i> deletion.....                                                                                                    | 8  |
| Figure S6. Geographical view of the Southeast Asian region, represented by the ancestry of individuals with the <i>TM4SF20</i> founder deletion mutation..... | 10 |
| Figure S7. <i>TM4SF20</i> expression in adult human brain.....                                                                                                | 11 |
| Table S1. Clinical indication and <i>TM4SF20</i> deletion, observed in 15,493 children in group 1.....                                                        | 12 |
| Table S2. WMH frequency in <i>TM4SF20</i> deletion compared to other studies of pediatric WMH.....                                                            | 13 |
| Table S3. WMH and 76 pediatric TCH Vietnamese cases with speech/developmental delay/autism spectrum disorder (group 2).....                                   | 14 |
| Table S4. <i>TM4SF20</i> deletion observed in 415 Vietnamese children in the three study groups.....                                                          | 15 |
| Table S5. Clinical characteristics of all studied children and adults with <i>TM4SF20</i> deletion.....                                                       | 16 |
| Table S6. Neurocognitive profile of individual adult carriers in the study.....                                                                               | 17 |



§ *TM4SF20* deletion was only observed in children with phenotypes highlighted in red

†The frequency of the deletion is 4/79 (5%), taking only the phenotype highlighted in red

MCA, multiple congenital anomalies; DF, dysmorphic features; CHD, congenital heart defects; DD, developmental delay; ASD, autism spectrum disorder; LD, language delay; SD, speech delay

**Figure S1.** Study design showing evaluation of three major groups for the *TM4SF20* complex deletion

# Family TM200



**Figure S2.** Extended pedigree analysis of the Vietnamese family, TM200, using brain imaging studies. The proband TM201 and her 37-year-old asymptomatic father, TM202, were ascertained with the 4-kb deletion. Subject TM201, born prematurely has gross enlargement of the third and lateral ventricles with near complete loss of periventricular white matter. There is additional T2 hyperintensity in a left PCA (posterior cerebral artery) pattern of distribution, consistent with an additional ischemic event involving a medium size vessel (marked by a broader white arrow). The father, TM202 has multi-focal punctate T2 hyperintensities, returned from the fronto-parietal white matter of both hemispheres. The deletion, present in the paternal grandfather, was also observed in proband's two asymptomatic paternal aunts, TM205 and TM206. The 40-year old paternal aunt, TM206 with no known vascular risk factors, has multi-focal T2 hyperintensities in the subcortical and periventricular white matter, very similar in distribution to the other carrier families. Her two children with normal speech acquisition were negative for the deletion. TM205 had a normal brain imaging study. The non-carrier mother, TM204, and the non-carrier brother had essentially normal brain MRI studies.



**Figure S3.** *TM4SF20* deletion in the Vietnamese patient, 017-1 and his 5-year-old brother with significant language impairment. Family studies showing the 1-kb junction fragment in the two siblings with severe language delay and their 37-year-old mother. Note the multi-focal T2 hyperintensities in the periventricular and deep white matter (highlighted by arrows) in the apparently healthy mother with no known cerebrovascular risk factors.



**Figure S4.** Extended analysis of family TM900 from Philippines, using long range PCR studies. The family was self-referred due to a strong history of early language delay in multiple family members, all demonstrating high educational achievement. PCR studies showed the deletion CNV segregating with early language delay in this family.



**Figure S5.** WMH in adults with *TM4SF20* deletion. T2 weighted and fluid-attenuated inversion recovery (FLAIR) sequence magnetic resonance imaging (MRI) scans of adults with *TM4SF20* deletion are presented, showing varying degree of white matter disease ranging from punctate T2 hyperintensities in the subcortical white matter to multi-focal T2 hyperintensities in the periventricular and deep white matter. Note in particular, the brain imaging studies of TM1203, a high-functioning parent with *TM4SF20* homozygous deletion. There are punctate foci of abnormal T2 hyperintensity returned from the subcortical white matter in the right insular region. Her neuroradiological abnormalities are similar to those seen in most heterozygous carrier parents.



**Figure S6.** Geographical view of the Southeast Asian region, represented by the ancestry of individuals with the *TM4SF20* founder deletion mutation. Vietnam, Thailand, Burma, Philippines, and Indonesia are designated in red symbols. We ascertained one additional family from Micronesia (Map source: Nations Online Project).



**Figure S7.** *TM4SF20* expression in adult human brain. Images were obtained from the Allen Institute for Brain Science

([http://human.brain-map.org/mri\\_viewer?donor=9861&probes=1038873](http://human.brain-map.org/mri_viewer?donor=9861&probes=1038873)). Note the relatively high expression of the gene (marked in red) in the parietal lobe, hippocampus, pons, white matter, and cerebellum.

**Table S1**

Clinical indication and *TM4SF20* deletion, observed in 15,493 children in group 1 (all ethnicities). Note that the 4-kb deletion is only seen in children referred for disorders of communication, developmental delay, and brain imaging abnormalities ( $p = 1.7 \times 10^{-6}$ ).

| <b>Phenotype</b>                   | <b>Number of cases</b> | <b><i>TM4SF20</i> deletion</b> |
|------------------------------------|------------------------|--------------------------------|
| <b>Developmental delay</b>         | <b>4343</b>            | <b>5</b>                       |
| Indication not specified           | 2906                   | 0                              |
| <b>Autism spectrum disorder</b>    | <b>1464</b>            | <b>1</b>                       |
| Dysmorphic features                | 1336                   | 0                              |
| Seizures                           | 874                    | 0                              |
| Multiple congenital anomalies      | 806                    | 0                              |
| Congenital heart defects           | 701                    | 0                              |
| Failure to thrive                  | 452                    | 0                              |
| <b>Speech delay</b>                | <b>383</b>             | <b>8</b>                       |
| Neuromuscular problems             | 368                    | 0                              |
| Skeletal problems                  | 344                    | 0                              |
| ADHD                               | 233                    | 0                              |
| Suspected chromosomal abnormality  | 216                    | 0                              |
| <b>Brain imaging abnormalities</b> | <b>200</b>             | <b>1</b>                       |
| Pertinent family history           | 146                    | 0                              |
| Urogenital abnormalities           | 129                    | 0                              |
| Hearing loss                       | 89                     | 0                              |
| Behavioral problems                | 85                     | 0                              |
| Cleft lip/palate                   | 77                     | 0                              |
| Endocrinopathy                     | 66                     | 0                              |
| Eye abnormalities                  | 58                     | 0                              |
| Neuropsychiatric disorder          | 58                     | 0                              |
| Respiratory problems               | 45                     | 0                              |
| Skin problems                      | 31                     | 0                              |
| Metabolic disease                  | 30                     | 0                              |
| Congenital Diaphragmatic Hernia    | 15                     | 0                              |
| Hydrops                            | 15                     | 0                              |
| Tumor                              | 13                     | 0                              |
| Immune defect                      | 10                     | 0                              |

**Table S2:** WMH frequency in *TM4SF20* deletion compared to other studies of pediatric WMH

| References                                               | Number of Individuals with WMH/<br>Total number of subjects studied with brain MRI | Frequency<br>(95% CI)       | Pediatric phenotype                                                                                 | Compared to children with <i>TM4SF20</i> deletion<br><br>p-value |
|----------------------------------------------------------|------------------------------------------------------------------------------------|-----------------------------|-----------------------------------------------------------------------------------------------------|------------------------------------------------------------------|
| <b>Specific genetic causes and WMH</b>                   |                                                                                    |                             |                                                                                                     |                                                                  |
| <b><i>TM4SF20</i> deletion</b>                           | <b>10/14</b>                                                                       | <b>71.4% (41.9%, 91.6%)</b> | <b>Language delay</b>                                                                               | -                                                                |
| Hyman <i>et al.</i> <sup>1</sup>                         | 68/76                                                                              | 89.4% (80.3%, 95.3%)        | Children with Neurofibromatosis type 1                                                              | 0.986                                                            |
| Eichler <i>et al.</i> <sup>2</sup>                       | 33/34                                                                              | 97% (84.6%, 99.9%)          | Metachromatic leukodystrophy                                                                        | 0.999                                                            |
| Unpublished data (Texas Children's Hospital, Texas)      | 4/51                                                                               | 7.8% (2.1%, 18.8%)          | 16p11.2 deletion/duplication carriers with language delay, autism, seizures, or developmental delay | <b>1.406 x 10<sup>-5</sup></b>                                   |
| <b>Non-specific genetic/environmental causes and WMH</b> |                                                                                    |                             |                                                                                                     |                                                                  |
| Kim <i>et al.</i>                                        | 3/225                                                                              | 1.3% (0.3%, 3.9%)           | Healthy children, 1 month to 18 years                                                               | <b>2.589 x 10<sup>-11</sup></b>                                  |
| Kalnin <i>et al.</i>                                     | 8/281                                                                              | 2.8% (1.2%, 5.5%)           | Unprovoked first seizure                                                                            | <b>3.924 x 10<sup>-10</sup></b>                                  |
| Gupta and Belay                                          | 30/666                                                                             | 4.5% (3.1%, 6.4%)           | Migraines, seizures, developmental delay or attention deficit hyperactivity disorder                | <b>1.603 x 10<sup>-9</sup></b>                                   |
| Decobert <i>et al.</i>                                   | 17/100                                                                             | 17.0% (10.2%, 25.8%)        | Unexplained intellectual impairment (IQ < 70)                                                       | <b>1.966 x 10<sup>-4</sup></b>                                   |
| Kieslich <i>et al.</i>                                   | 15/75                                                                              | 20.0% (11.6%, 30.8%)        | Celiac disease                                                                                      | <b>7.643 x 10<sup>-4</sup></b>                                   |
| Verbruggen <i>et al.</i>                                 | 21/80                                                                              | 26.3% (17.0%, 37.3%)        | Abnormal neurological signs, abnormal head circumference or other specific reasons for MRI          | <b>3.786 x 10<sup>-3</sup></b>                                   |
| Widjaja <i>et al.</i>                                    | 23/90                                                                              | 25.6% (16.9%, 35.8%)        | Idiopathic developmental delay                                                                      | <b>2.922 x 10<sup>-3</sup></b>                                   |

**Table S3:** WMH and 76 pediatric TCH Vietnamese cases with speech/developmental delay/autism spectrum disorder (group 2). The *TM4SF20* deletion is observed in 3/19 (~16%) children with WMH in this study. The frequency of WMH in deletion vs non-deletion cases is statistically significant ( $p = 0.0461$ , Fisher's exact test).

|                  | WMH present | WMH absent | Total |
|------------------|-------------|------------|-------|
| Deletion present | 3           | 1          | 4     |
| Deletion absent  | 16          | 56         | 72    |
| Total            | 19          | 57         | 76    |

**Table S4.** *TM4SF20* deletion observed in 415 Vietnamese children in the three study groups.

Note that the deletion is only observed in Vietnamese children with disorders of communication and brain imaging abnormalities ( $p = 5.4 \times 10^{-4}$ ).

| Phenotype                                                                   | Vietnamese Cases<br>(Groups 1 and 2)<br>N=244 | Vietnamese Cases<br>(Group 3)<br>N=171 | Total<br>n=415 | <i>TM4SF20</i><br>deletion<br>present |
|-----------------------------------------------------------------------------|-----------------------------------------------|----------------------------------------|----------------|---------------------------------------|
| Dysmorphic features/Multiple congenital anomalies/Congenital heart defects  | 60                                            | 67                                     | 127            | 0                                     |
| <b>Developmental delay</b>                                                  | <b>39</b>                                     | <b>45</b>                              | <b>84</b>      | <b>3</b>                              |
| <b>Autism spectrum disorder</b>                                             | <b>40</b>                                     | <b>23</b>                              | <b>63</b>      | <b>1</b>                              |
| Endocrinopathy/Urogenital abnormalities/Failure to thrive/skeletal problems | 27                                            | 7                                      | 34             | 0                                     |
| Seizures/neuromuscular problems                                             | 25                                            | 8                                      | 33             | 0                                     |
| <b>Speech/language delay</b>                                                | <b>24</b>                                     | <b>3</b>                               | <b>27</b>      | <b>3</b>                              |
| Indication not specified                                                    | 13                                            | 6                                      | 19             | 0                                     |
| <b>Brain imaging abnormality</b>                                            | <b>7</b>                                      | <b>8</b>                               | <b>15</b>      | <b>3</b>                              |
| †Other                                                                      | 9                                             | 4                                      | 13             | 0                                     |

DF/MCA/congenital heart defects/endocrinopathy/urogenital abnormalities/FTT/skeletal problems- (127+34+33+13) **0/207**

DD/ASD/speech delay/brain imaging abnormalities (84+63+27+15) **10/189**

†Includes immune defects, metabolic abnormalities, tumor, non-immune hydrops

**Table S5.** Clinical characteristics of all studied children and adults with *TM4SF20* deletion  
(pediatric patients are highlighted in green)

|    | Family | IDs    | Affected         | Ethnicity                | Ages        | Language delay | MRI done | WMH | Family Structure in the United States |
|----|--------|--------|------------------|--------------------------|-------------|----------------|----------|-----|---------------------------------------|
| 1  | TM100  | TM101  | Proband          | Burmese                  | 4 y         | +              | +        | +   | Nuclear –Burmese refugees             |
| 2  | TM100  | TM102  | Mother           | Burmese                  | 36 y        | U              | +        | +   |                                       |
| 3  | TM200  | TM201  | Proband          | Vietnamese               | 1 ½ y       | +              | +        | +   | Extended pedigree                     |
| 4  | TM200  | TM202  | Father           | Vietnamese               | 35 y        | +              | +        | +   |                                       |
| 5  | TM200  | TM205  | Pat aunt         | Vietnamese               | 36 y        | U              | +        | -   |                                       |
| 6  | TM200  | TM206  | Pat aunt         | Vietnamese               | 40 y        | +              | +        | +   |                                       |
| 7  | TM300  | TM301  | Proband          | Hispanic                 | 3 ½ y       | +              | +        | +   | Unknown-adopted                       |
| 8  | TM400  | TM401  | Proband          | Burmese                  | 7 ½ y       | +              | +        | -   | Nuclear-Burmese refugees              |
| 9  | TM400  | TM402  | Father           | Burmese                  | 52 y        | U              | +        | +   |                                       |
| 10 | TM500  | TM501  | Proband          | Burmese                  | 2 ½ y       | +              | +        | +   | Nuclear                               |
| 11 | TM500  | TM502  | Father           | Burmese                  | 39 y        | U              | +        | +   |                                       |
| 12 | TM600  | TM601  | Proband          | Thai/<br>Hispanic        | 4 ½ y       | +              | +        | +   | Nuclear-Thai mother adopted           |
| 13 | TM600  | TM602  | Mother           | Thai                     | 35 y        | U              | +        | +   |                                       |
| 14 | TM700  | TM701  | Proband          | Vietnamese               | 4 y         | +              | +        | -   | Extended-declined further studies     |
| 15 | TM700  | TM702  | Mother           | Vietnamese               | 29 y        | U              | +        | -   |                                       |
| 16 | TM800  | TM801  | Proband          | Filipino/<br>Pakistani   | 3 y         | +              | +        | +   | Nuclear-Filipino mother adopted       |
| 17 | TM800  | TM802  | Mother           | Filipino                 | 36 y        | U              | +        | +   |                                       |
| 18 | TM900  | TM901  | Proband          | Filipino                 | 2 y         | +              | +        | -   | Extended-Studied                      |
| 19 | TM900  | TM902  | Mother           | Filipino                 | 32 y        | +              | +        | -   |                                       |
| 20 | TM900  | TM905  | Mat GF           | Filipino                 | 61 y        | +              | ND       | U   |                                       |
| 21 | TM900  | TM904  | Mat uncle        | Filipino                 | 31 y        | +              | ND       | U   |                                       |
| 22 | 017    | 017-1  | Proband          | Vietnamese               | 7 y         | +              | +        | +   | Nuclear                               |
| 23 | 017    | 017-3  | Mother           | Vietnamese               | 39 y        | U              | +        | +   |                                       |
| 24 | 017    | 017-2  | Sibling          | Vietnamese               | 5 y         | +              | +        | -   |                                       |
| 25 | TM1000 | TM1001 | Proband          | Indonesian/<br>European  | 1 ½ y       | +              | +        | -   | Nuclear                               |
| 26 | TM1000 | TM1002 | Father           | Indonesian               | 30 y        | +              | +        | +   |                                       |
| 27 | TM1000 | TM1003 | Sibling          | Indonesian/<br>European  | 2 y         | +              | ND       | U   |                                       |
| 28 | TM1100 | TM1101 | Proband          | Burmese                  | 1 ½ y       | +              | +        | +   | Nuclear-Burmese refugees              |
| 29 | TM1100 | TM1102 | Father           | Burmese                  | 42 y        | U              | +        | -   |                                       |
| 30 | TM1100 | TM1103 | Sibling          | Burmese                  | 5 y         | +              | +        | -   | Nuclear-Burmese refugees              |
| 31 | TM1100 | TM1104 | Sibling          | Burmese                  | 3 y         | +              | +        | +   |                                       |
| 32 | TM1200 | TM1201 | Proband          | Vietnamese/<br>European  | 4 y         | +              | ND       | U   | Extended                              |
| 33 | TM1200 | TM1202 | Deceased sibling | Vietnamese/<br>European  | Still-birth | U              | ND       | U   |                                       |
| 34 | TM1200 | TM1203 | Parent           | Vietnamese               | 36 y        | +              | +        | +   |                                       |
| 35 | TM1300 | TM1301 | Proband          | Unknown                  | 1 ½ y       | +              | +        | +   | Unknown-adopted                       |
| 36 | TM1400 | TM1401 | Proband          | Micronesian/<br>European | 13 y        | +              | +        | +   | Extended                              |
| 37 | TM1400 | TM1402 | Parent           | Micronesian              | 50 y        | U              | +        | +   |                                       |

ND-Not done

U-Unknown

**Table S6.** Neurocognitive profile of individual adult carriers in the study

|                                   | TM102     |                | TM202     |                | 17-03     |                | TM902     |                |
|-----------------------------------|-----------|----------------|-----------|----------------|-----------|----------------|-----------|----------------|
|                                   | Raw Score | Standard Score |
| <b>Orientation</b>                |           |                |           |                |           |                |           |                |
| MMSE (max 30)                     | 25        |                | 30        |                | 27        |                | 29        |                |
| <b>Attention</b>                  |           |                |           |                |           |                |           |                |
| Digit Span Total (scaled score)   | 17        | 10             | 21        | 13             | 16        | 9              | 20        | 12             |
| Forward                           | 7         |                | 7         |                | 8         |                | 9         |                |
| Backward                          | 5         |                | 7         |                | 3         |                | 6         |                |
| Spatial Span Total (scaled score) | 15        | 10             | 11        | 6              | 13        | 8              | 17        | 10             |
| Forward                           | 8         |                | 4         |                | 5         |                | 6         |                |
| Backward                          | 7         |                | 4         |                | 5         |                | 6         |                |
| Symbol Digit (z score)            |           |                |           |                |           |                |           |                |
| Written                           | 35        | -0.05          | 51        | 0.06           | 27        | -3.05          | 60        | 0.25           |
| Oral                              | 45        | -1.45          | 57        | -0.27          | 34        | -2.56          | 70        | 0.37           |
| <b>Visuospatial</b>               |           |                |           |                |           |                |           |                |
| Clock-Command                     | 7         |                | 7         |                | 4         |                | 10        |                |
| Clock-Copy                        | 9         |                | 10        |                | 9         |                | 10        |                |
| JLO (%ile)                        | 17        | 4              | 21        | 22             | 15        | 2              | 24        | 40             |
| VMI (Standard Score)              | 28        | 98             | 28        | 98             | 21        | 57             | 27        | 92             |
| <b>Memory</b>                     |           |                |           |                |           |                |           |                |
| HVLT                              |           |                |           |                |           |                |           |                |
| Total 1-3 (z score)               | 29        | 0.05           | 16        | -2.00          | 19        | -2.30          | 28        | 0.37           |
| Delayed (z score)                 | 11        | 0.41           | 6         | -1.99          | 7         | -1.50          | 8         | 0.67           |
| Recognition (z score)             | 11        | 0.18           | 11        | -0.10          | 12        | 0.06           | 11        | 0.50           |
| WMS-III VR                        |           |                |           |                |           |                |           |                |
| VRI Total (scaled score)          | 89        | 11             | 88        | 11             | 80        | 7              | 95        | 12             |
| VRII Total (scaled score)         | 57        | 9              | 85        | 13             | 55        | 9              | 38        | 7              |
| <b>Language</b>                   |           |                |           |                |           |                |           |                |
| Verbal Fluency (T-score)          | 23        | 36             | 43        | 46             | 21        | 41             | 44        | 50             |
| Semantic Fluency (T-score)        | 17        | 45             | 17        | 44             | 13        | 43             | 27        | 59             |
| <b>Executive Functioning</b>      |           |                |           |                |           |                |           |                |
| WCST-64                           |           |                |           |                |           |                |           |                |
| Categories ( %ile)                | 2         | 11-16          | 3         | >16            | 2         | 11-16          | 5         | >16            |
| Total Errors (T-score)            | 29        | 30             | 22        | 37             | 34        | 34             | 10        | 48             |
| Perseverative Errors (T- score)   | 14        | 38             | 9         | 41             | 26        | 33             | 4         | 66             |
| <b>Mood</b>                       |           |                |           |                |           |                |           |                |
| GDS                               | 1         |                | 2         |                | 19        |                | 1         |                |

MMSE=Mini Mental Status Examination; Digit Span=Wechsler Memory Scale – III Digit Span; Spatial Span= Wechsler Memory Scale – III Spatial Span; Symbol Digit=Symbol Digit Modalities Test Oral and Written; JLO=Judgment of Line Orientation; VMI=Beery Visual Motor Integration Test; HVLT=Hopkins Verbal Learning Test; WMS-III VR= Wechsler Memory Scale – III Visual Reproduction I and II; WCST-64= Wisconsin Card Sorting Test-64 card version; GDS=Geriatric Depression Inventory

Scaled score: Mean=10; SD=3; Standard Score: Mean=100; SD=10; T-score: Mean=50; SD=10; z-score: Mean=0; SD=1; %ile: Mean=50; 1 SD range from 16-84%ile

## Supplemental References

1. Hyman SL, Gill DS, Shores EA, Steinberg A, North KN (2007) T2 hyperintensities in children with neurofibromatosis type 1 and their relationship to cognitive functioning. *J Neurol Neurosurg Psychiatry* 78:1088-1091
2. Eichler F, Grodd W, Grant E, Sessa M, Biffi A, Bley A, Kohlschuetter A, Loes DJ, Kraegeloh-Mann I (2009) Metachromatic leukodystrophy: a scoring system for brain MR imaging observations. *AJNR Am J Neuroradiol* 30:1893-1897
